# Supplementary material
Source: PubMed Central journal article supplement (PMC6432794)
Supplement: NIHMS1017166-supplement-S1.pdf [file NIHMS1017166-supplement-S1.pdf]

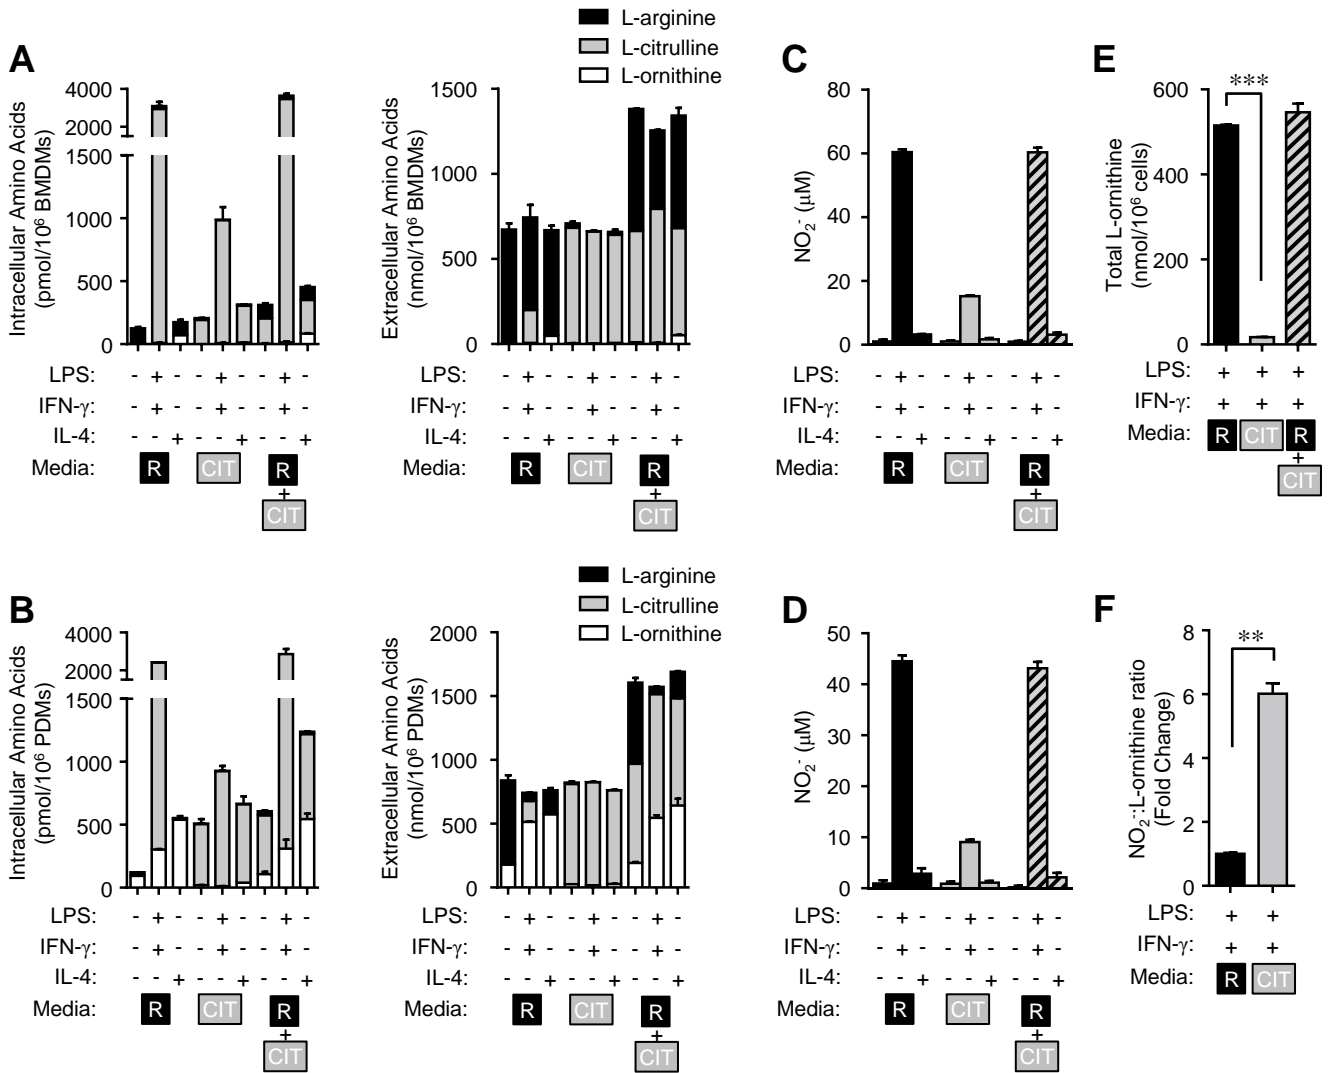

**Supplemental Figure 1.** L-arginine and L-citrulline metabolism in polarized primary MΦs. Bone marrow-derived MΦs (BMDMs) (A, C) and thioglycollate-elicited inflammatory peritoneal-derived MΦs (PDMs) (B, D-F) were cultured in R-free C-DMEM containing either 1 mM L-arginine [R], 1 mM L-citrulline [CIT], or both AAs. MΦs were stimulated with LPS + IFN- $\gamma$ , IL-4, or left unstimulated for 24 hours. (A, B) Cell lysates (intracellular) and supernatants (extracellular) were analyzed by LC-MS/MS to detect L-arginine, L-citrulline, and L-ornithine (n = 2). (C, D) Nitric oxide production was determined by analyzing supernatant nitrite (NO<sub>2</sub><sup>-</sup>) amounts by Griess assay (n = 4). (E) Total L-ornithine from PDMs combining intracellular and extracellular amounts. (F) The ratio of NO<sub>2</sub><sup>-</sup> to L-ornithine in PDMs was determined by dividing the concentration of NO<sub>2</sub><sup>-</sup> by L-ornithine (intracellular plus extracellular). Data are presented as fold change compared to PDMs cultured in L-arginine media (n = 2). Data are from 1 experiment. Error bars are the standard deviation. \*\* p < 0.01, \*\*\* p < 0.001 by Student's t test.
